# Supplementary material for: A novel asymmetric synthesis of cinacalcet hydrochloride
Source: PubMed Central journal article supplement (PMC3458763; doi:10.3762/bjoc.8.158), 2012-08-24
Supplement: Beilstein_J_Org_Chem-08-1366-s001.pdf [file Beilstein_J_Org_Chem-08-1366-s001.pdf]

# Supporting Information

for

## **A novel asymmetric synthesis of cinacalcet hydrochloride**

Veera R. Arava<sup>1\*</sup>, Laxminarasimhulu Gorentla<sup>1</sup> and Pramod K. Dubey<sup>2</sup>

Address: <sup>1</sup>R&D Laboratory, Suven Life Sciences Ltd., Hyderabad, India and

<sup>2</sup>Department of Chemistry, J. N. T. University, Hyderabad, India

Email: Veera Reddy Arava\* - reddyvenis@rediffmail.com; Laxminarasimhulu

Gorentla - laxman164@rediffmail.com; Pramod Kumar Dubey -

pramoddubey7@gmail.com

\*Corresponding author

**<sup>1</sup>H NMR, <sup>13</sup>C NMR and ESI-MS spectra**

**of compounds 1, 4, 5, 6 and 7**

## Table of contents

|                                                                                      |    |
|--------------------------------------------------------------------------------------|----|
| <sup>1</sup> H and <sup>13</sup> C NMR spectra of compound <b>4</b>                  | S3 |
| ESIMS of <b>4</b> and <sup>1</sup> H NMR spectrum of <b>5</b>                        | S4 |
| <sup>13</sup> C NMR of <b>5</b> and <sup>1</sup> H NMR spectrum of compound <b>6</b> | S5 |
| <sup>13</sup> C NMR of <b>6</b> and <sup>1</sup> H NMR spectrum of compound <b>7</b> | S6 |
| <sup>13</sup> C NMR and ESIMS spectra of compound <b>7</b>                           | S7 |
| <sup>1</sup> H and <sup>13</sup> C NMR spectra of compound <b>1</b>                  | S8 |
| ESI-MS spectrum of <b>1</b>                                                          | S9 |

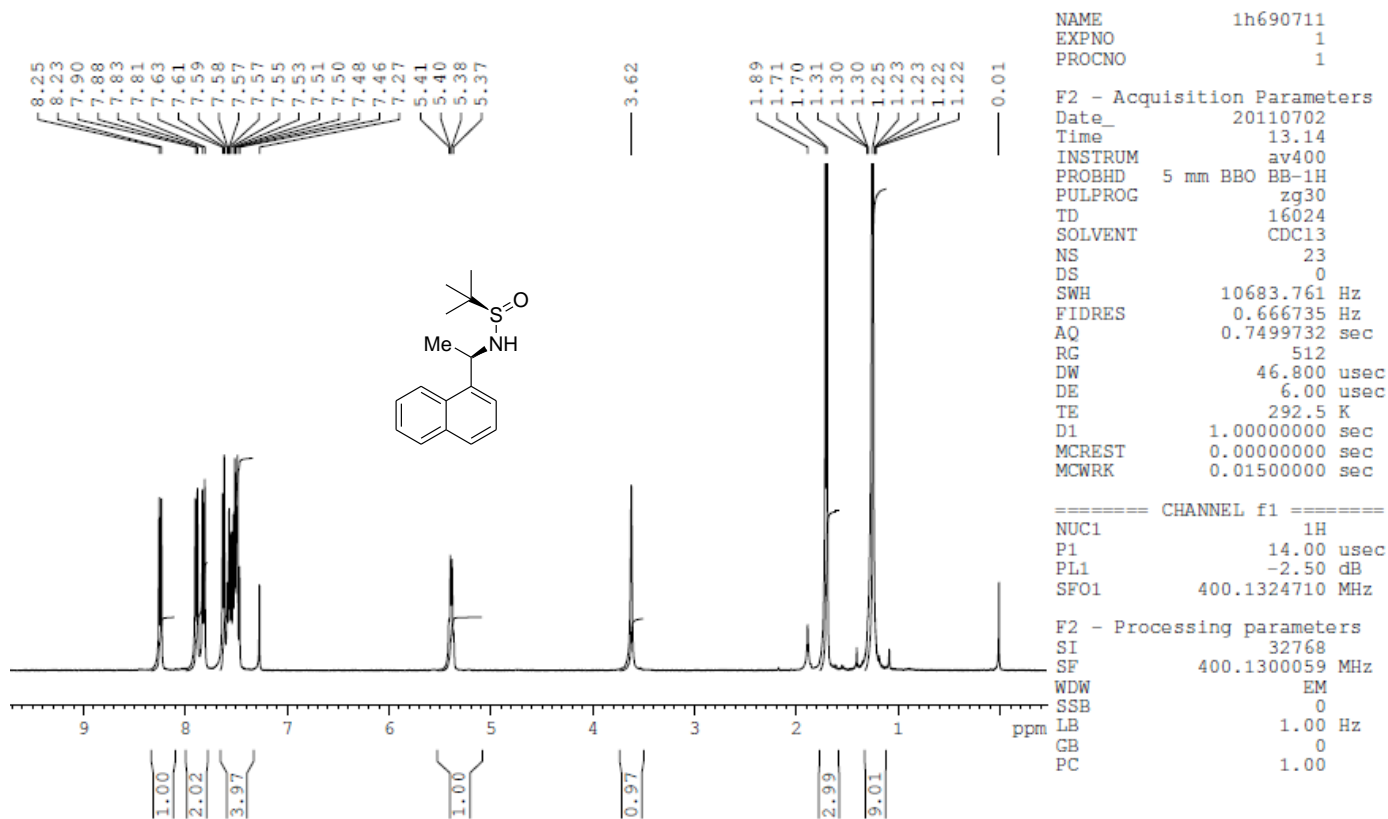

<sup>1</sup>H NMR spectrum of compound 4

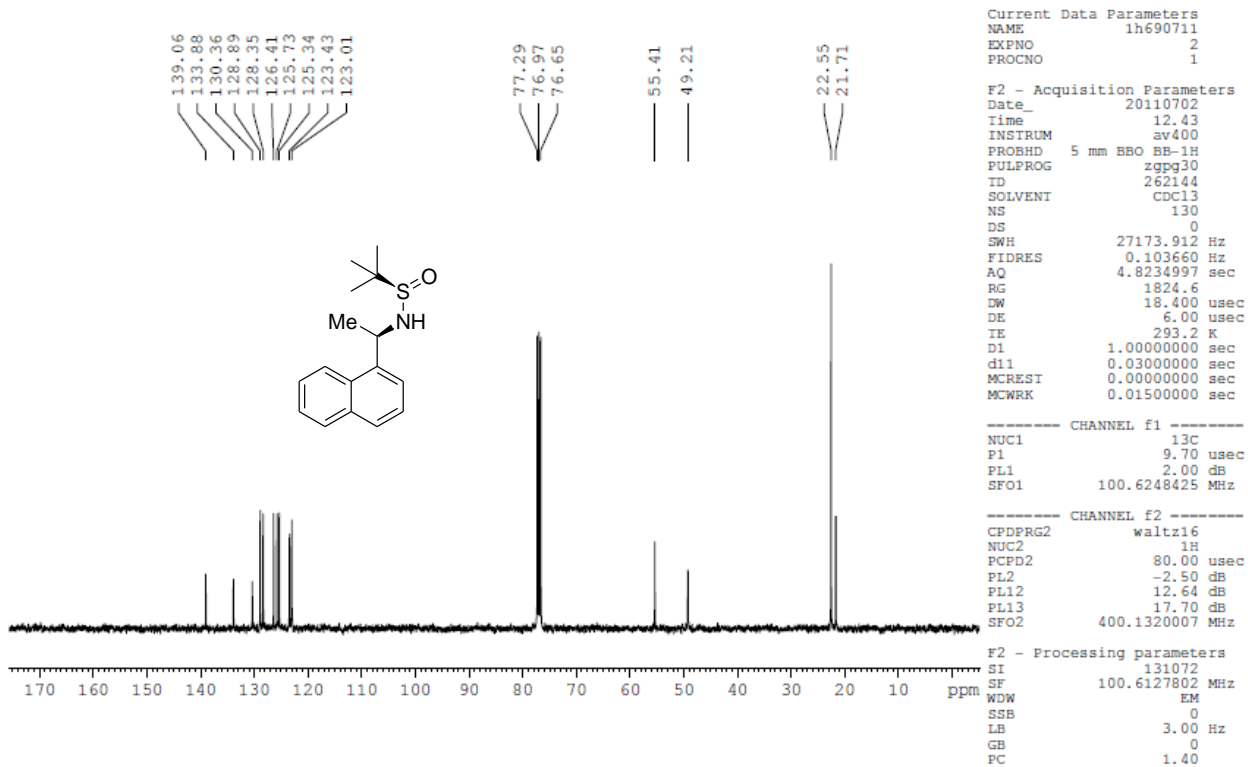

<sup>13</sup>C NMR spectrum of compound 4



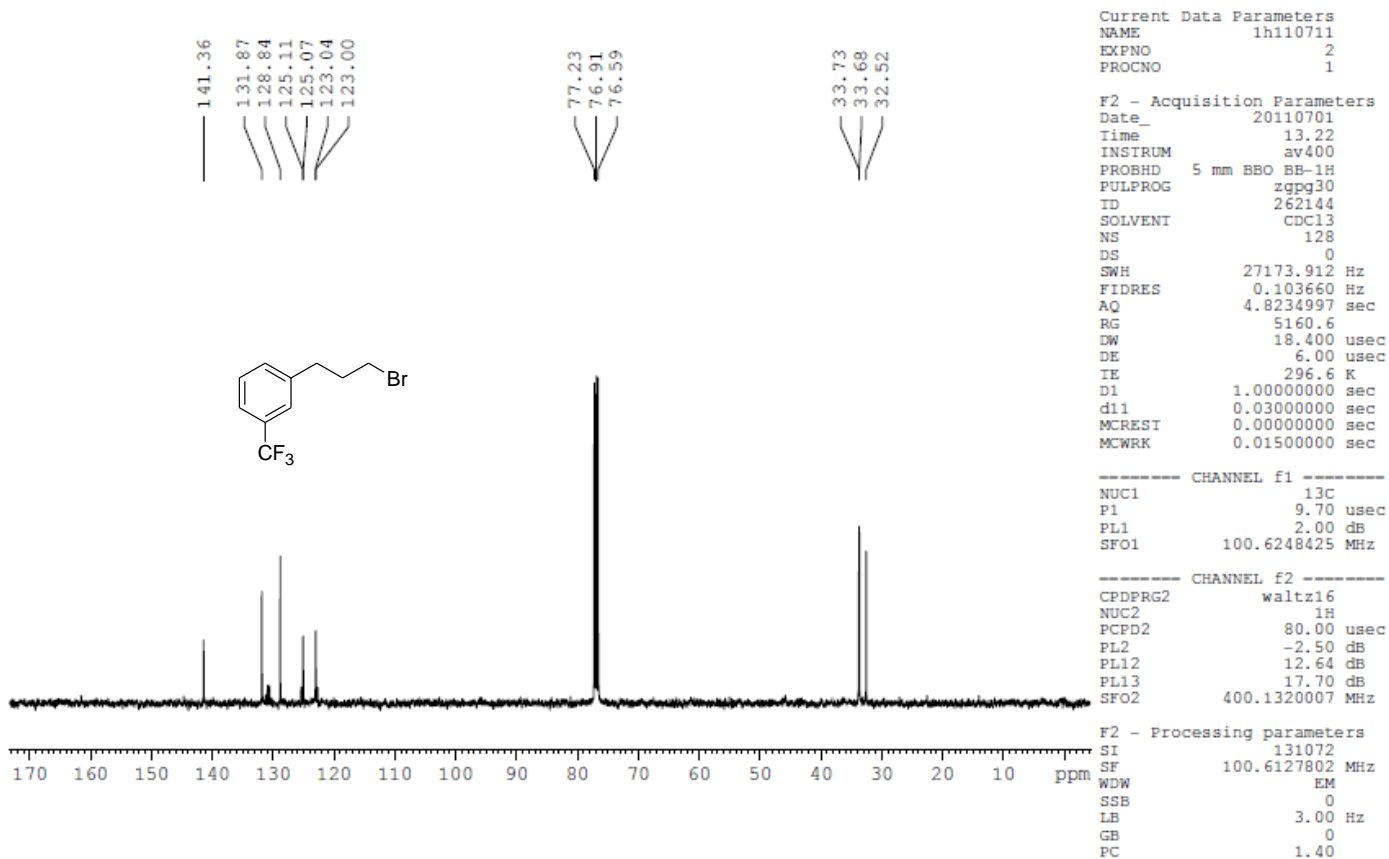

<sup>13</sup>C NMR spectrum of compound 5

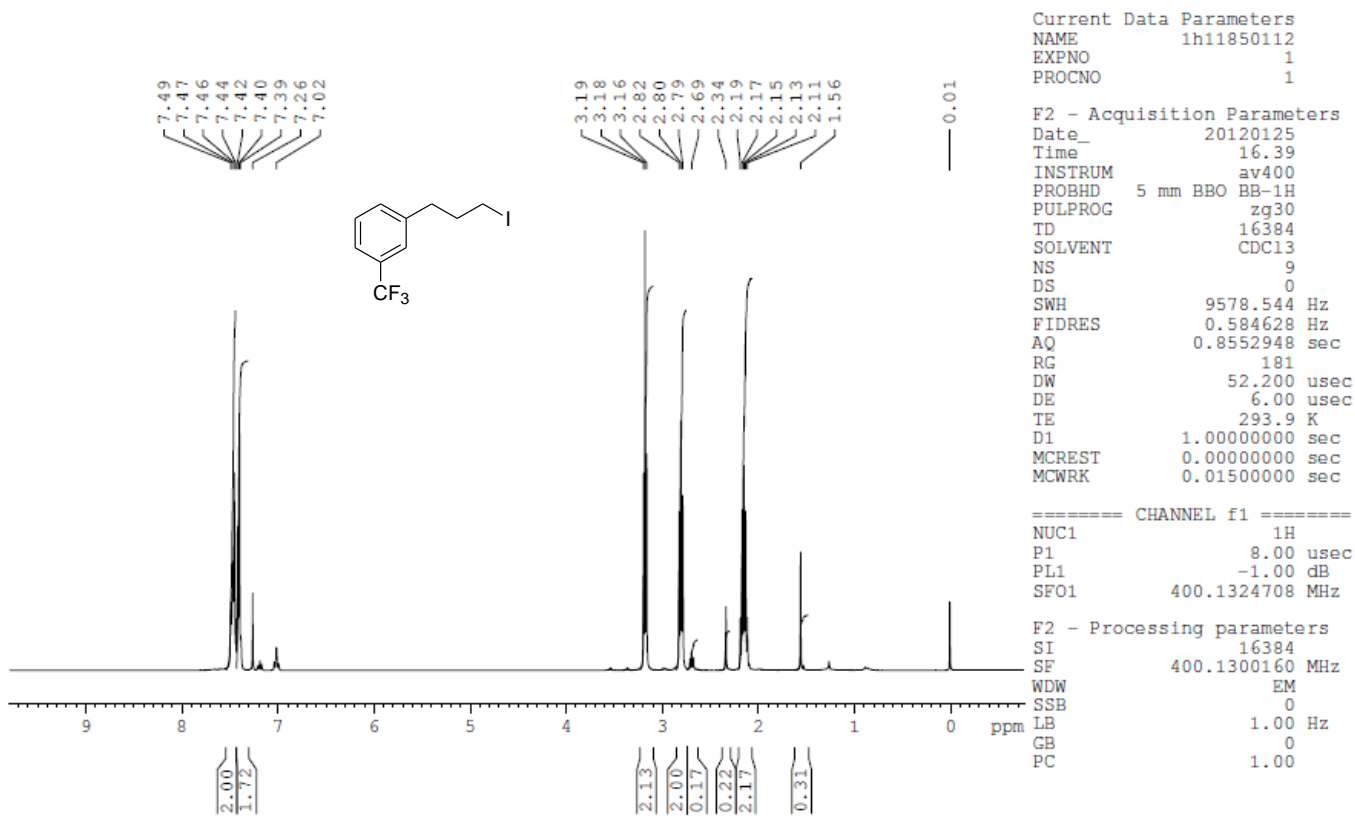

<sup>1</sup>H NMR spectrum of compound 6

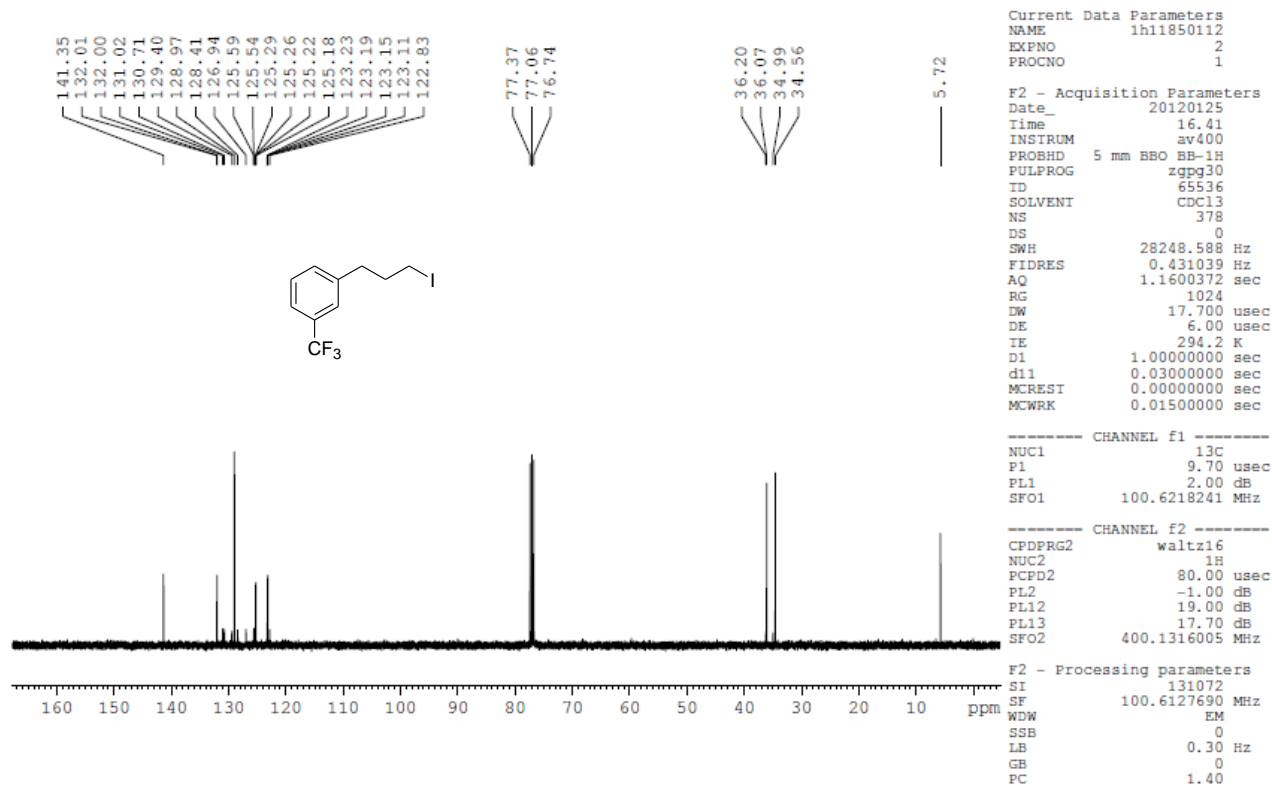

<sup>13</sup>C NMR spectrum of compound 6

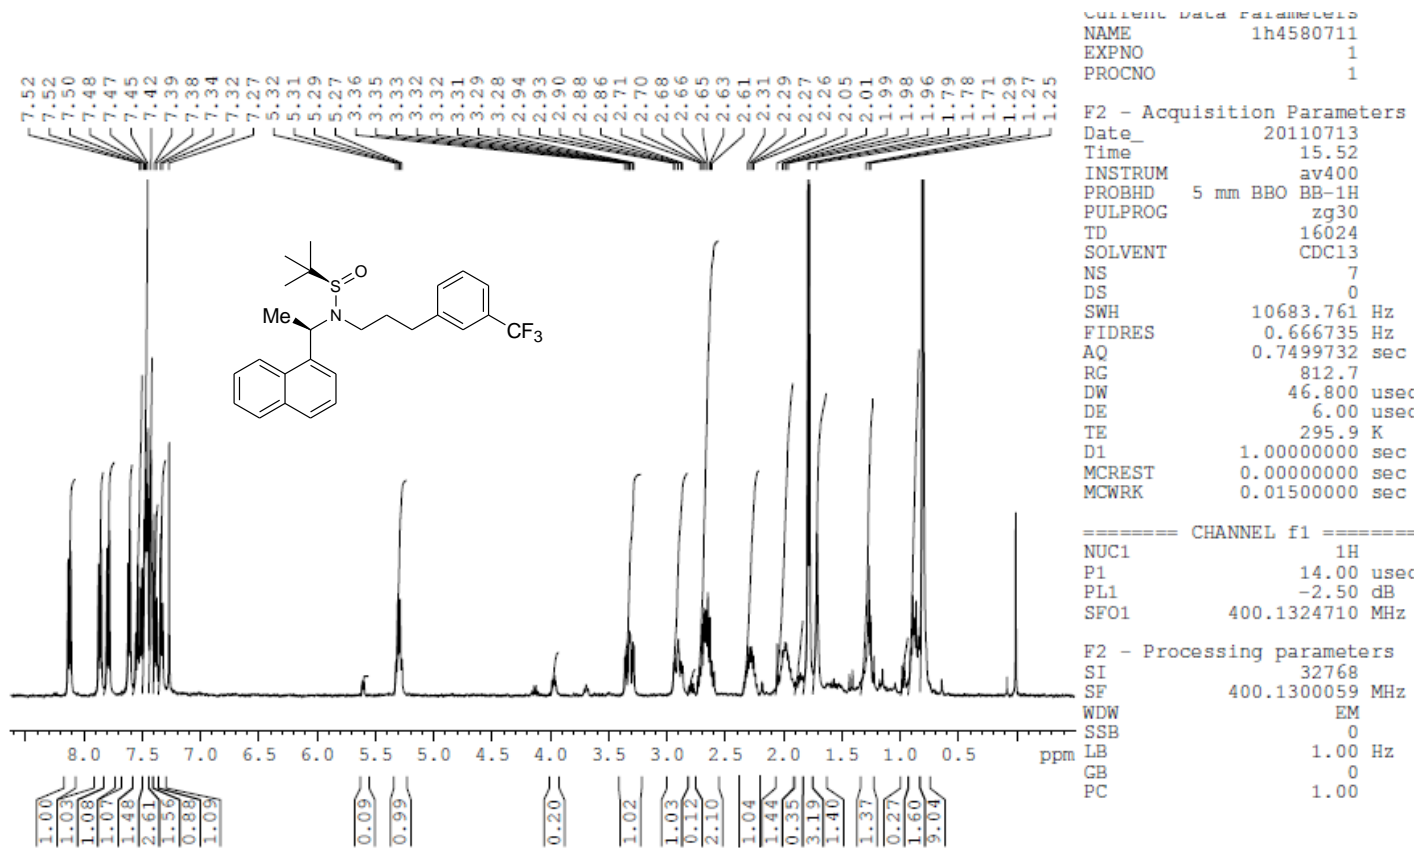

<sup>1</sup>H NMR spectrum of compound 7

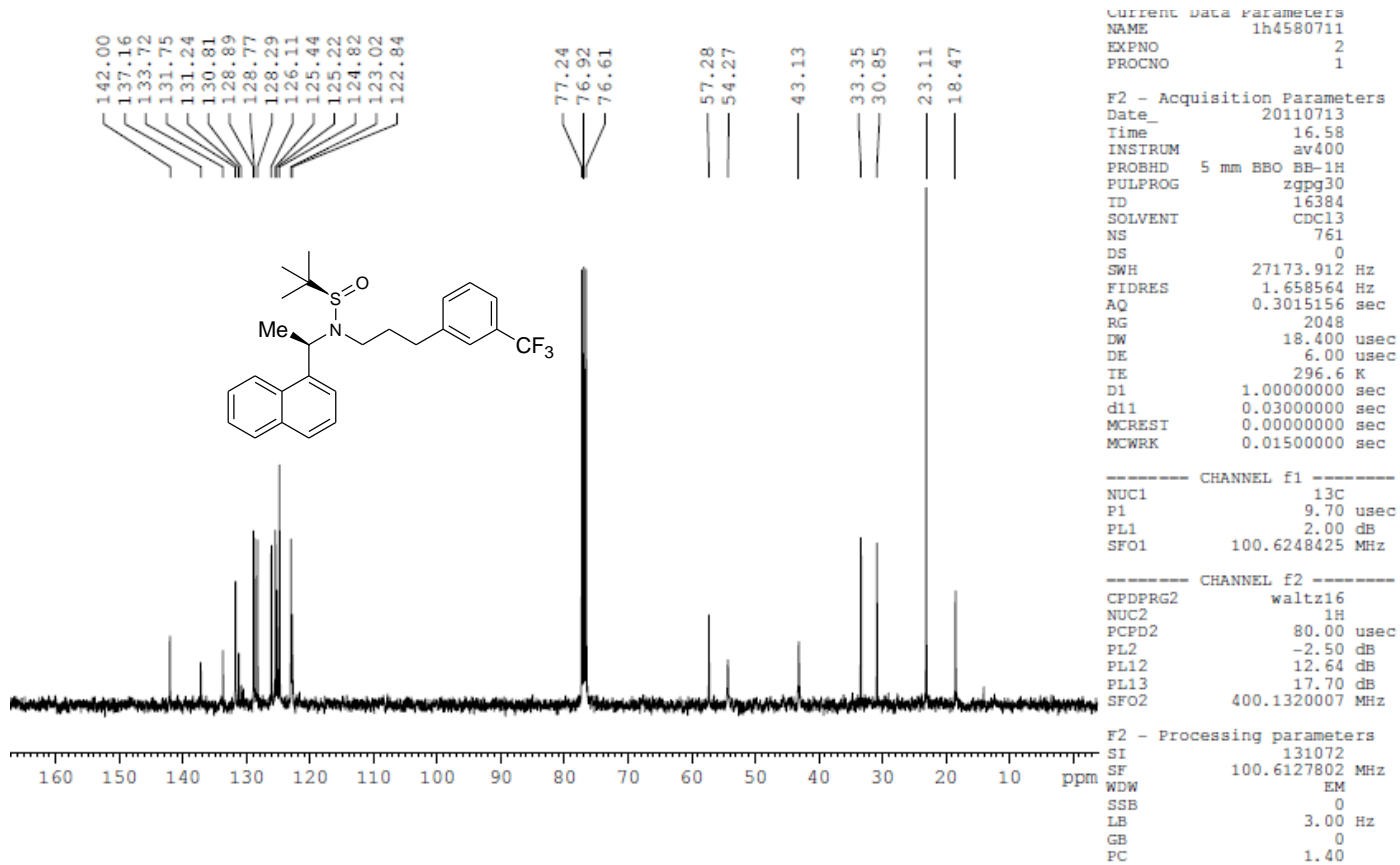

<sup>13</sup>C NMR spectrum of compound 7

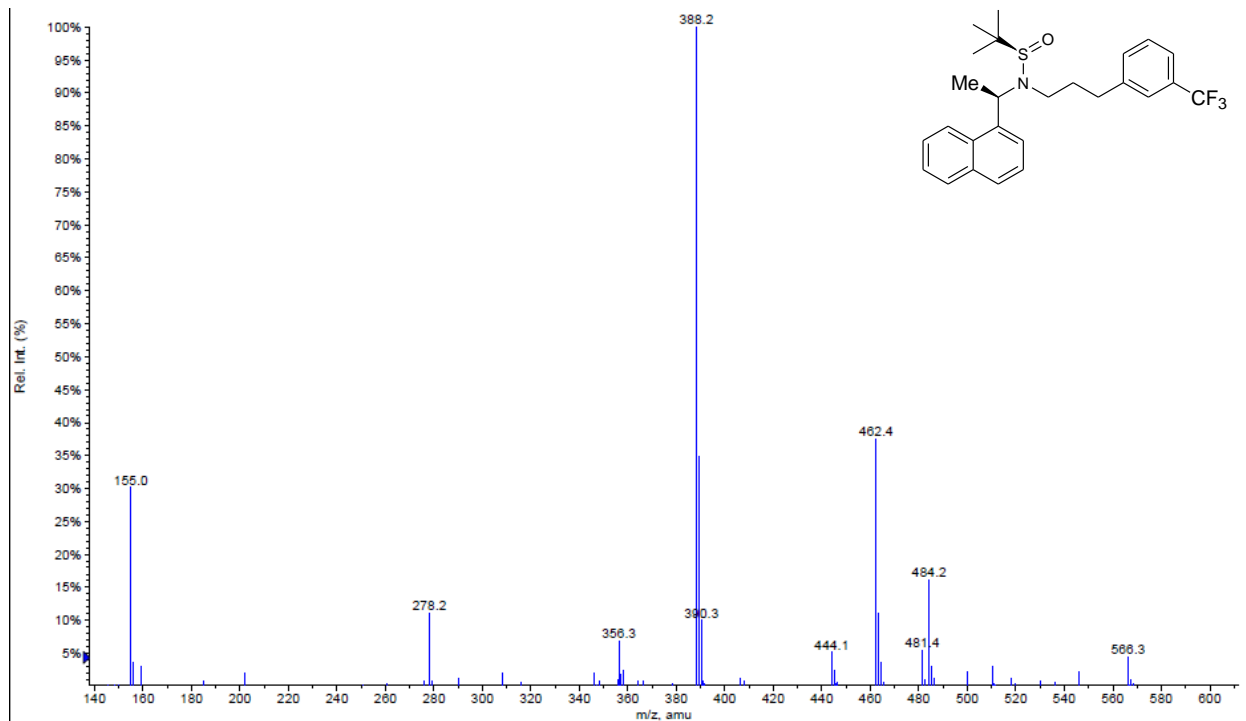

ESIMS spectrum of compound 7

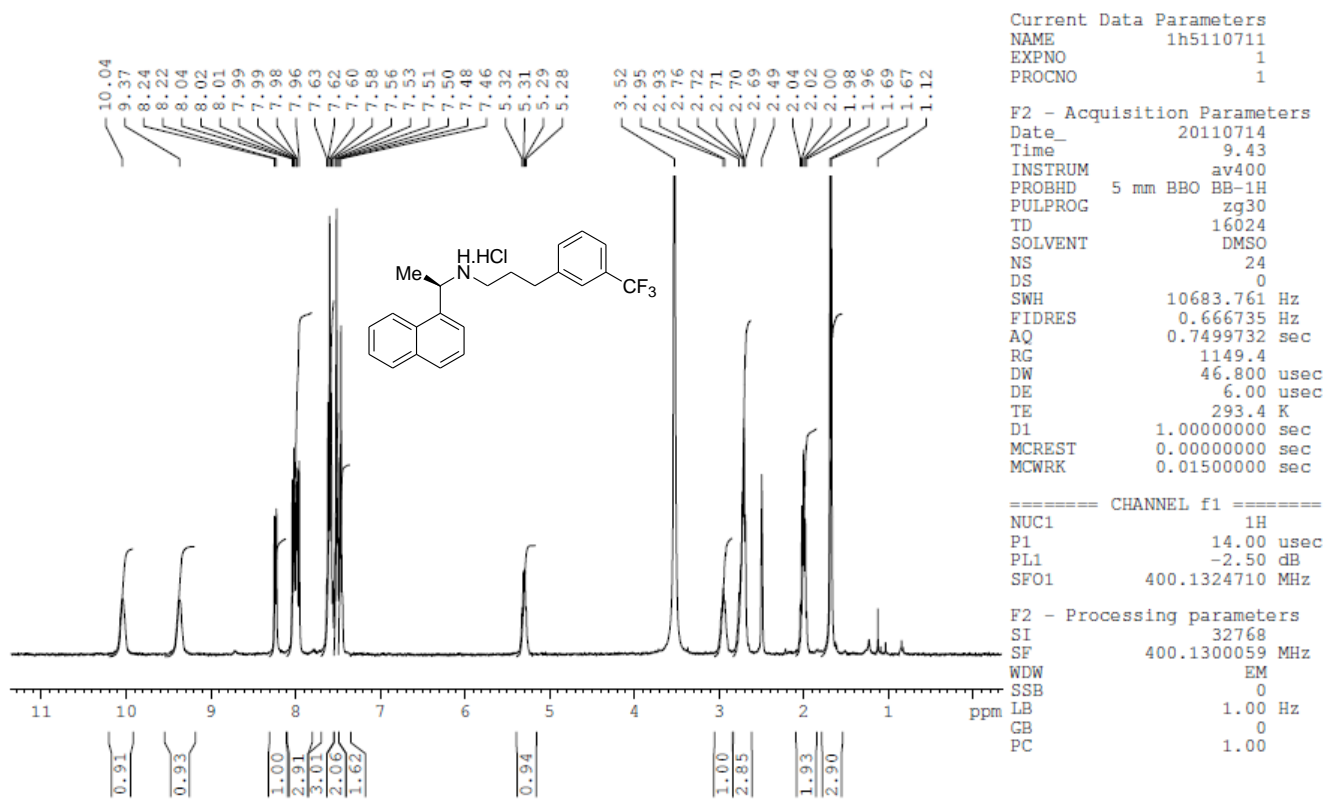

<sup>1</sup>H NMR spectrum of compound 1

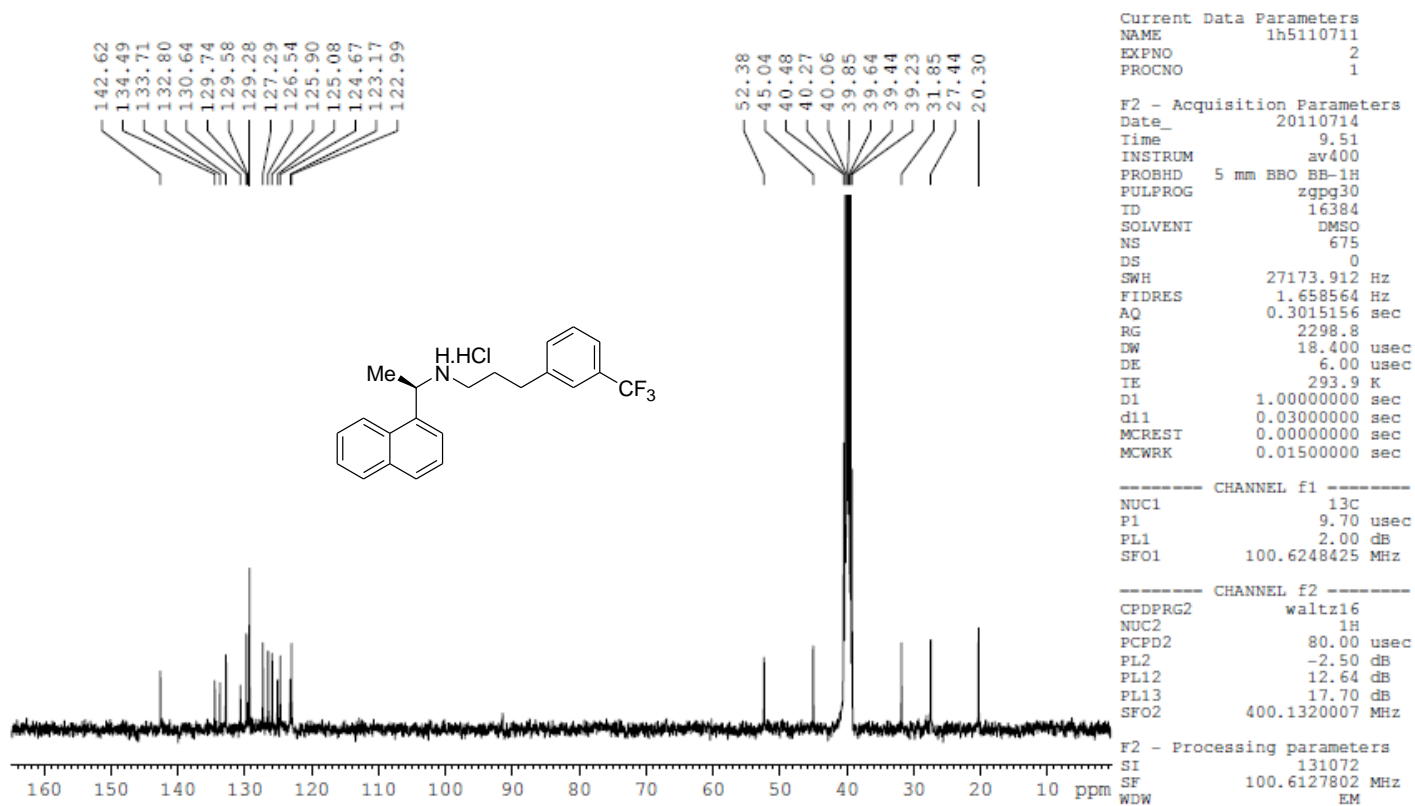

<sup>13</sup>C NMR spectrum of compound 1



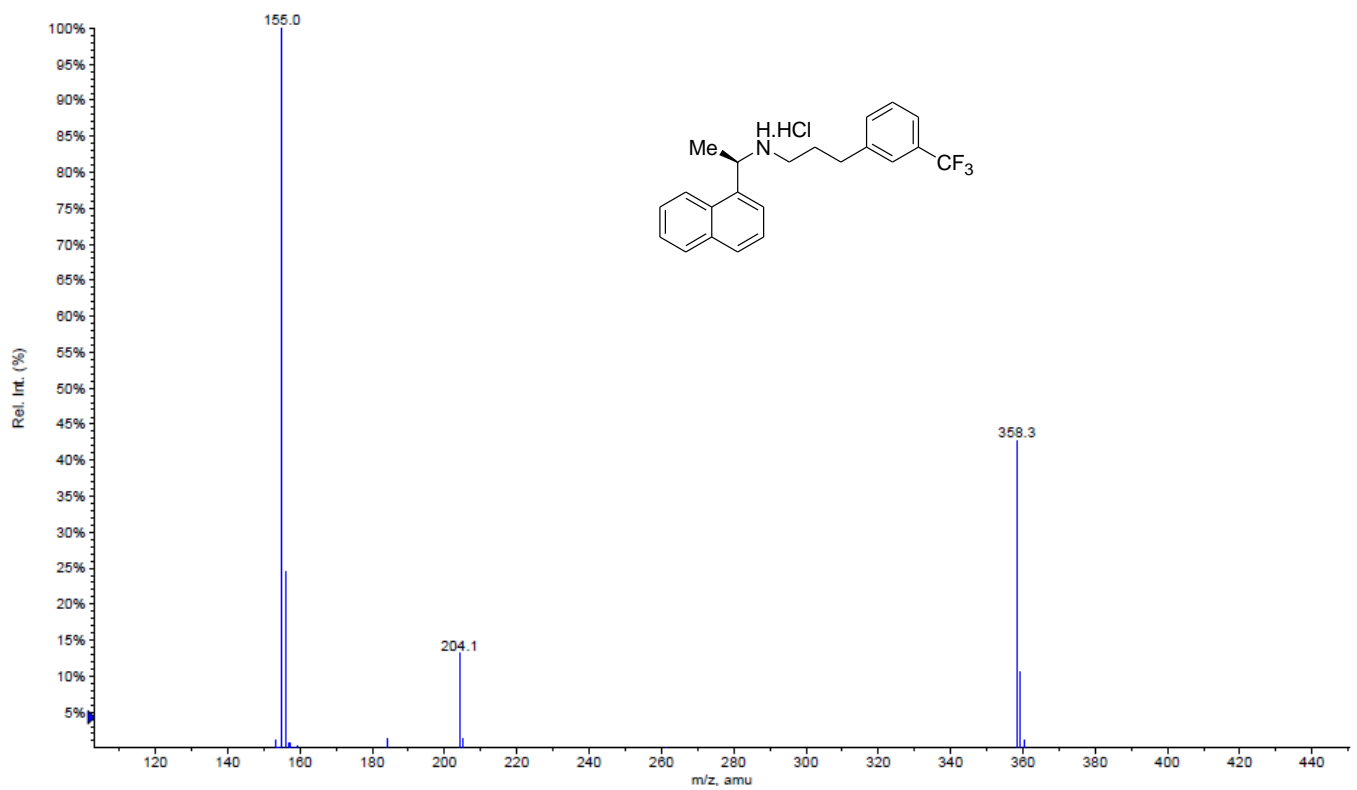

ESIMS spectrum of compound 1
